# Supplementary material
Source: publisher figshare collection journal article supplement (https://acs.figshare.com/ndownloader/files/7543453)
Supplement: Supplementary file [file 7543453]

# A Versatile Method to Determine the Cellular Bioavailability of Small-Molecule Inhibitors

Kevin B. Teuscher,<sup>†</sup> § Min Zhang,<sup>†</sup> and Haitao Ji<sup>†, ‡, §, \*</sup>

<sup>†</sup> Drug Discovery Department, H. Lee Moffitt Cancer Center and Research Institute, 12902 Magnolia Drive, Tampa, Florida 33612–9416, United States.

<sup>‡</sup> Department of Oncologic Sciences, University of South Florida College of Medicine, Tampa, Florida 33612, United States.

§ Department of Chemistry, University of Utah, Salt Lake City, Utah 84112, United States.

\*Correspondence to: Dr. Haitao Ji (E-mail: [Haitao.Ji@moffitt.org](mailto:Haitao.Ji@moffitt.org))

## Table of Contents

|                              |         |
|------------------------------|---------|
| Supplemental Procedures..... | S2      |
| Figure S1.....               | S3–S4   |
| Figure S2.....               | S5–S8   |
| Figure S3.....               | S9      |
| Figure S4.....               | S10     |
| Figure S5.....               | S11     |
| Figure S6.....               | S12     |
| Figure S7.....               | S13     |
| Figure S8.....               | S14–S17 |
| Table S1.....                | S18     |
| Supplementary Reference..... | S19     |

**Supplemental Procedure.**

**MTs cell viability assay.** MDA-MB-231 were seeded in the 96-well plates at  $4 \times 10^3$  cells/well, maintained overnight at 37 °C, and incubated with **1** (TP-472), **2** (BAY-299), and **4** at various concentrations. Cell viability was monitored after 72 h using a freshly prepared mixture of 1 part phenazine methosulfate (PMS, Sigma) solution (0.92 mg/mL) and 19 parts 3-(4,5-dimethylthiazol-2-yl)-5-(3-carboxymethoxyphenyl)-2-(4-sulfophenyl)-2H-tetrazolium (MTs, Promega) solution (2 mg/mL). Cells were incubated in 10  $\mu$ L of this solution at 37 °C for 3 h, and A<sub>490</sub> was measured. The effect of the compound is expressed as the concentration required to reduce A<sub>490</sub> by 50% (IC<sub>50</sub>) relative to DMSO-treated cells. Experiments were performed in triplicate.

The MTs cell viability assay result of **3** for triple negative breast cancer MDA-MB-231 cells have previously been reported.<sup>24</sup>

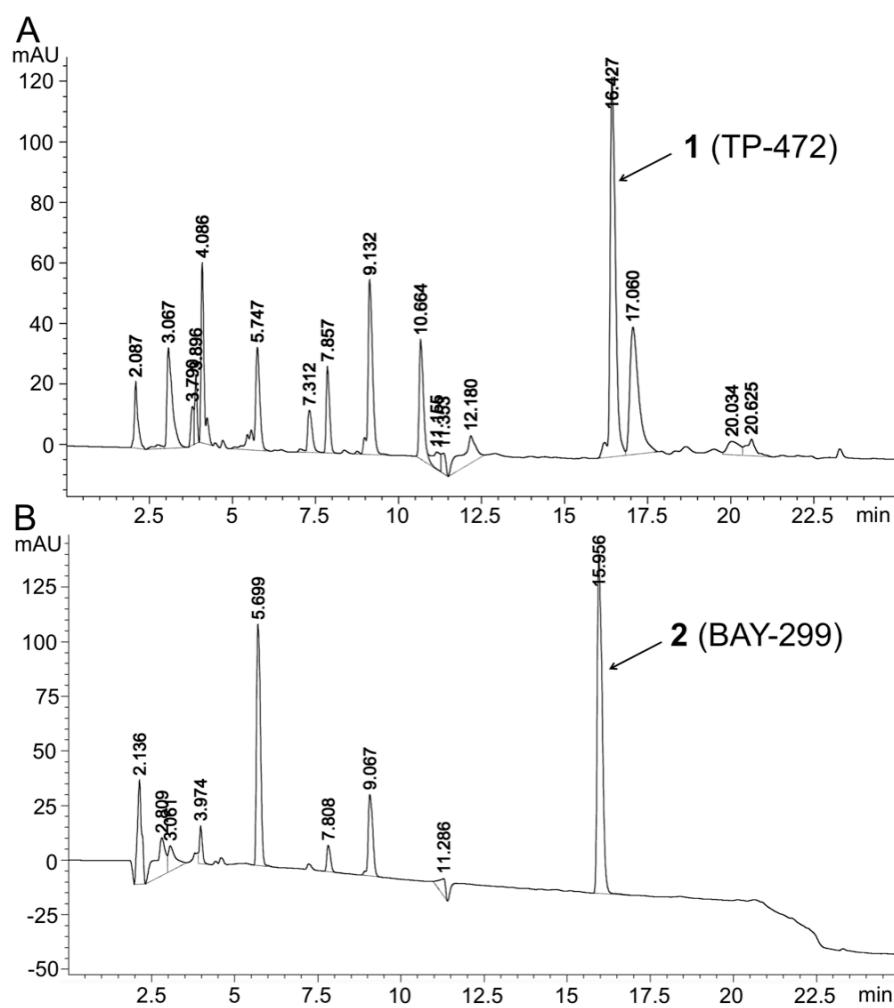

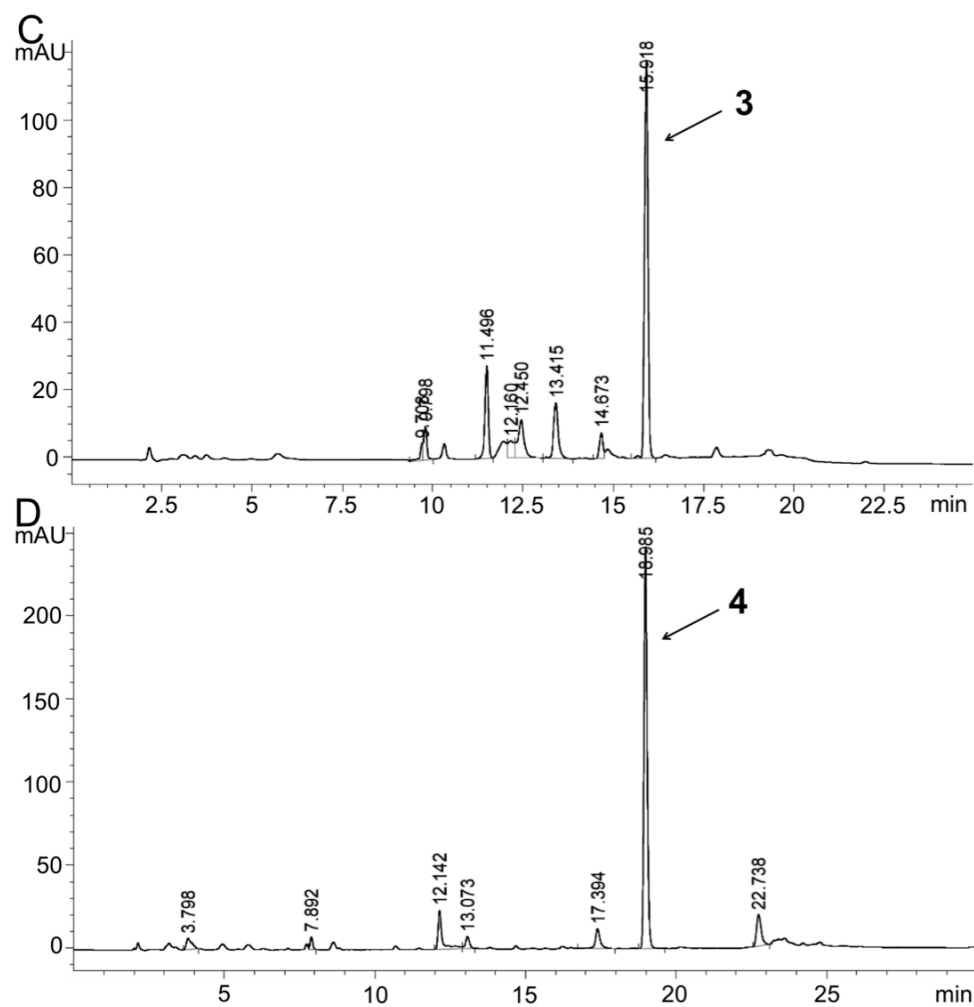

**Figure S1.** HPLC chromatograms of **1** (TP-472), **2** (BAY-299), **3**, and **4** in 5 mL DMEM with fetal bovine serum (FBS) (10% for **1** and **2**; 5% for **3** and **4**) at the starting time point.

**A**

| HPLC Injection<br>(20 $\mu$ L) | Concentration of 1<br>(mol/L) | AUC (mAU)          |
|--------------------------------|-------------------------------|--------------------|
| 1                              | $7.67 \times 10^{-4}$         | $1.51 \times 10^4$ |
| 2                              |                               | $1.51 \times 10^4$ |
| 3                              |                               | $1.50 \times 10^4$ |
| 1                              | $3.84 \times 10^{-4}$         | $7.63 \times 10^3$ |
| 2                              |                               | $7.63 \times 10^3$ |
| 3                              |                               | $7.62 \times 10^3$ |
| 1                              | $1.92 \times 10^{-4}$         | $3.74 \times 10^3$ |
| 2                              |                               | $3.74 \times 10^3$ |
| 3                              |                               | $3.71 \times 10^3$ |
| 1                              | $9.59 \times 10^{-5}$         | $1.84 \times 10^3$ |
| 2                              |                               | $1.84 \times 10^3$ |
| 3                              |                               | $1.84 \times 10^3$ |
| 1                              | $4.79 \times 10^{-5}$         | $9.47 \times 10^2$ |
| 2                              |                               | $9.55 \times 10^2$ |
| 3                              |                               | $9.45 \times 10^2$ |
| 1                              | $1.20 \times 10^{-5}$         | $2.50 \times 10^2$ |
| 2                              |                               | $2.49 \times 10^2$ |
| 3                              |                               | $2.48 \times 10^2$ |
| 1                              | $3.00 \times 10^{-6}$         | $7.82 \times 10^1$ |
| 2                              |                               | $6.64 \times 10^1$ |
| 3                              |                               | $1.85 \times 10^1$ |

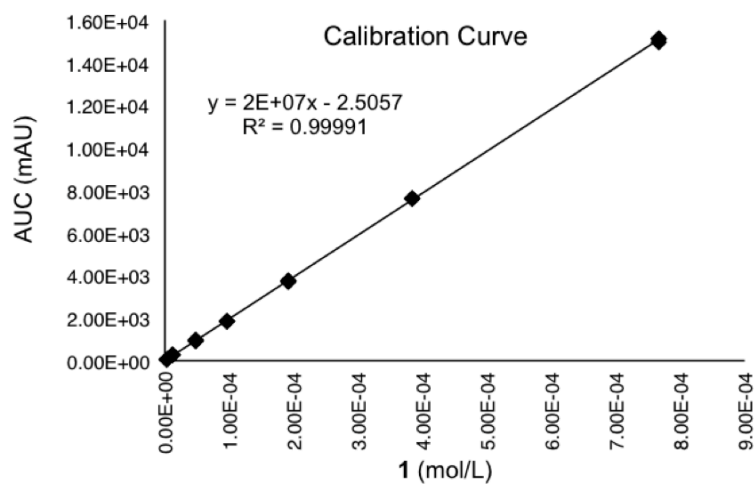

| B | HPLC Injection<br>(20 $\mu$ L) | Concentration of <b>2</b><br>(mol/L) | AUC (mAU)          |
|---|--------------------------------|--------------------------------------|--------------------|
|   | 1                              | $5.38 \times 10^{-4}$                | $6.21 \times 10^3$ |
|   | 2                              |                                      | $6.21 \times 10^3$ |
|   | 3                              |                                      | $6.13 \times 10^3$ |
|   | 1                              | $2.69 \times 10^{-4}$                | $3.18 \times 10^3$ |
|   | 2                              |                                      | $3.18 \times 10^3$ |
|   | 3                              |                                      | $3.18 \times 10^3$ |
|   | 1                              | $1.34 \times 10^{-4}$                | $1.58 \times 10^3$ |
|   | 2                              |                                      | $1.60 \times 10^3$ |
|   | 3                              |                                      | $1.58 \times 10^3$ |
|   | 1                              | $6.72 \times 10^{-5}$                | $7.96 \times 10^2$ |
|   | 2                              |                                      | $7.95 \times 10^2$ |
|   | 3                              |                                      | $7.96 \times 10^2$ |
|   | 1                              | $3.36 \times 10^{-5}$                | $3.71 \times 10^2$ |
|   | 2                              |                                      | $3.68 \times 10^2$ |
|   | 3                              |                                      | $3.71 \times 10^2$ |
|   | 1                              | $8.40 \times 10^{-6}$                | $8.88 \times 10^1$ |
|   | 2                              |                                      | $8.88 \times 10^1$ |
|   | 3                              |                                      | $8.88 \times 10^1$ |
|   | 1                              | $2.10 \times 10^{-6}$                | $2.09 \times 10^1$ |
|   | 2                              |                                      | $2.08 \times 10^1$ |
|   | 3                              |                                      | $2.03 \times 10^1$ |

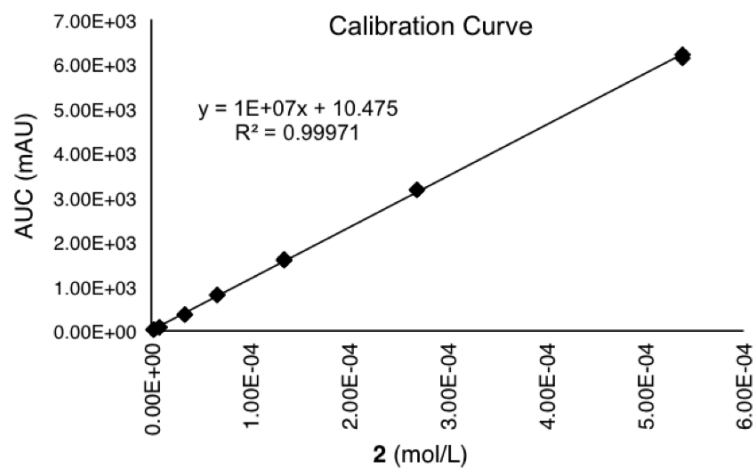

**C**

| HPLC Injection<br>(10 $\mu$ L) | Concentration of <b>3</b><br>(mol/L) | AUC (mAU)          |
|--------------------------------|--------------------------------------|--------------------|
| 1                              | $1.72 \times 10^{-3}$                | $1.60 \times 10^4$ |
| 2                              |                                      | $1.70 \times 10^4$ |
| 3                              |                                      | $1.50 \times 10^4$ |
| 1                              | $8.62 \times 10^{-4}$                | $6.37 \times 10^3$ |
| 2                              |                                      | $6.76 \times 10^3$ |
| 3                              |                                      | $7.54 \times 10^3$ |
| 1                              | $4.31 \times 10^{-4}$                | $2.92 \times 10^3$ |
| 2                              |                                      | $2.71 \times 10^3$ |
| 3                              |                                      | $2.94 \times 10^3$ |
| 1                              | $2.15 \times 10^{-4}$                | $1.03 \times 10^3$ |
| 2                              |                                      | $9.55 \times 10^2$ |
| 3                              |                                      | $9.10 \times 10^2$ |
| 1                              | $1.08 \times 10^{-4}$                | $3.15 \times 10^2$ |
| 2                              |                                      | $2.25 \times 10^2$ |

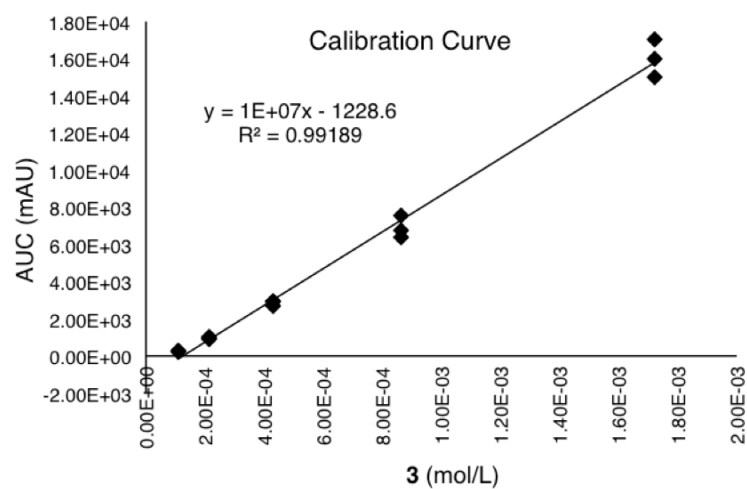

**D**

| HPLC Injection<br>(20 $\mu$ L) | concentration of <b>4</b><br>(mol/L) | AUC (mAU)          |
|--------------------------------|--------------------------------------|--------------------|
| 1                              | $1.27 \times 10^{-3}$                | $1.53 \times 10^4$ |
| 2                              |                                      | $1.53 \times 10^4$ |
| 3                              |                                      | $1.49 \times 10^4$ |
| 1                              | $6.37 \times 10^{-4}$                | $7.25 \times 10^3$ |
| 2                              |                                      | $7.15 \times 10^3$ |
| 3                              |                                      | $7.27 \times 10^3$ |
| 1                              | $3.19 \times 10^{-4}$                | $3.40 \times 10^3$ |
| 2                              |                                      | $3.57 \times 10^3$ |
| 3                              |                                      | $3.24 \times 10^3$ |
| 1                              | $1.59 \times 10^{-4}$                | $1.55 \times 10^3$ |
| 2                              |                                      | $1.54 \times 10^3$ |
| 3                              |                                      | $1.61 \times 10^3$ |
| 1                              | $7.97 \times 10^{-5}$                | $5.49 \times 10^2$ |
| 2                              |                                      | $4.89 \times 10^2$ |
| 3                              |                                      | $4.57 \times 10^2$ |
| 1                              | $3.98 \times 10^{-5}$                | $1.57 \times 10^2$ |
| 2                              |                                      | $1.34 \times 10^2$ |
| 3                              |                                      | $1.28 \times 10^2$ |

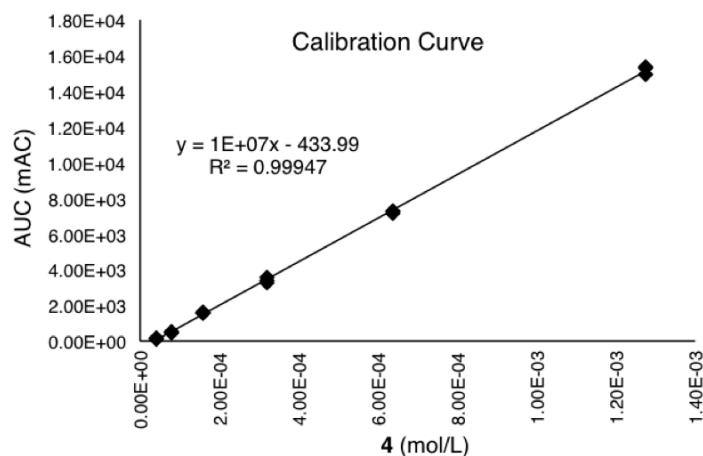

**Figure S2.** Determination of the calibration curves for **1–4**.



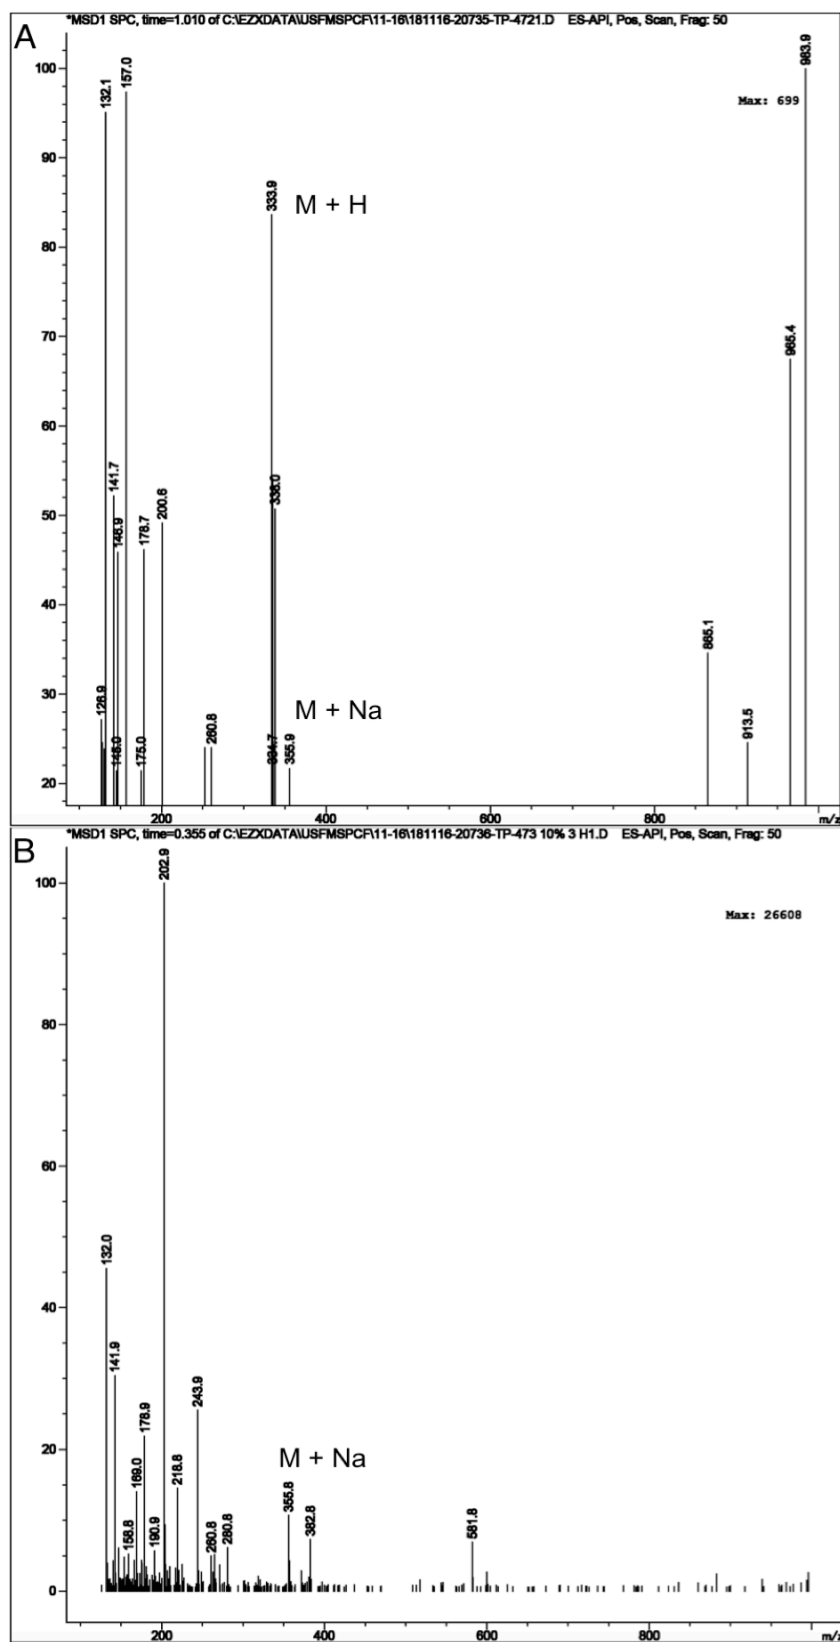

**Figure S3.** Mass spectrometry (MS) data for the HPLC peaks in Figure 3A. (A) pure **1**. (B) MDA-MB-231 cell samples after the treatment with **1** for 24 h.

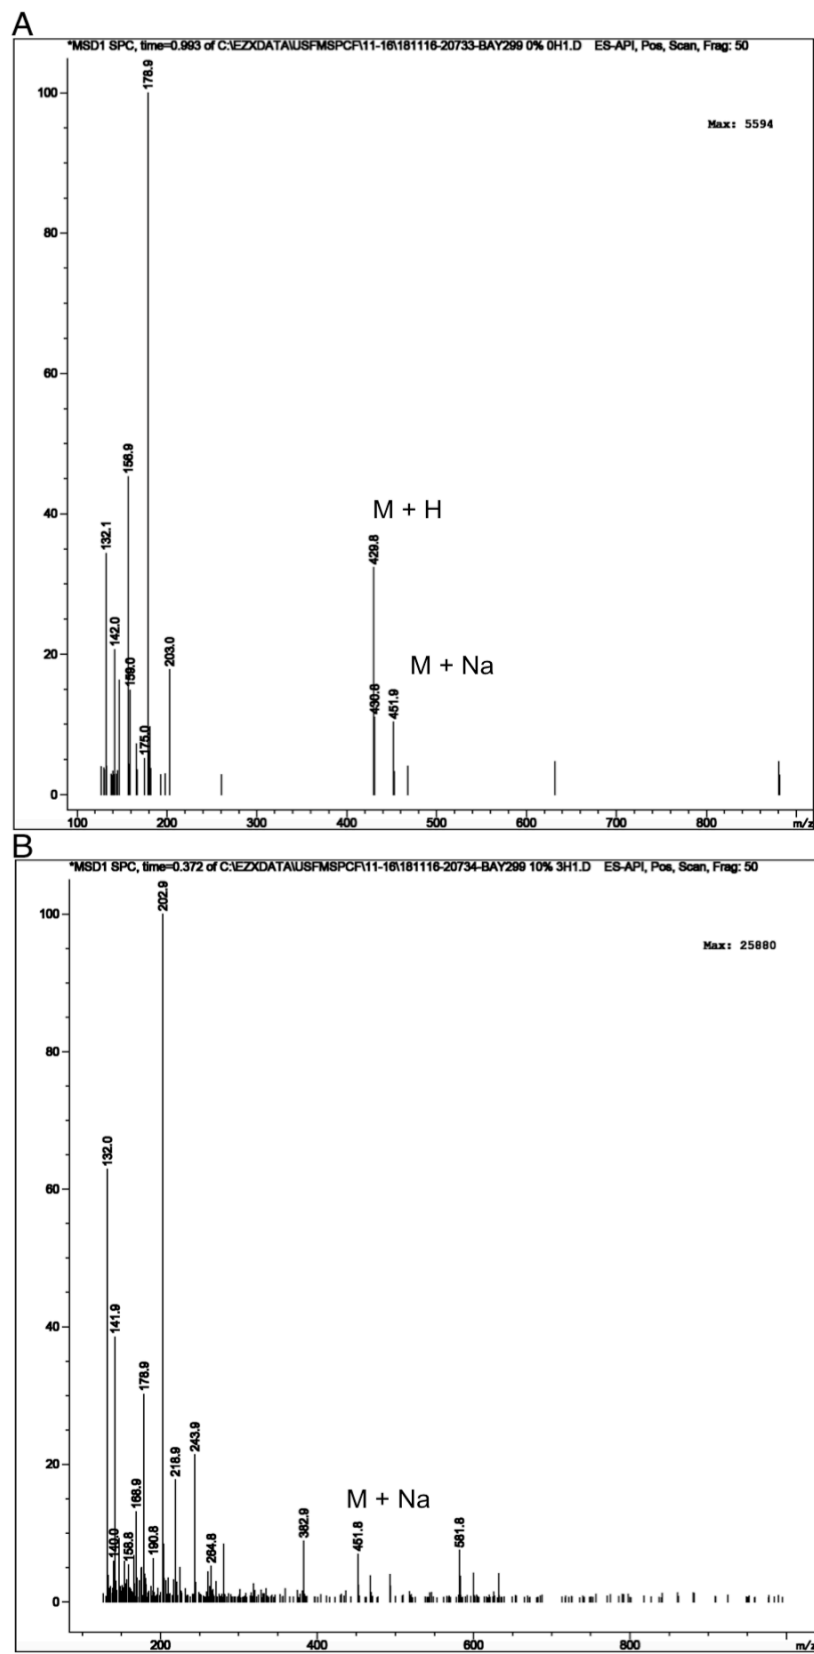

**Figure S4.** Mass spectrometry (MS) data for the HPLC peaks in Figure 3B. (A) pure **2**. (B) MDA-MB-231 cell samples after the treatment with **2** for 24 h.

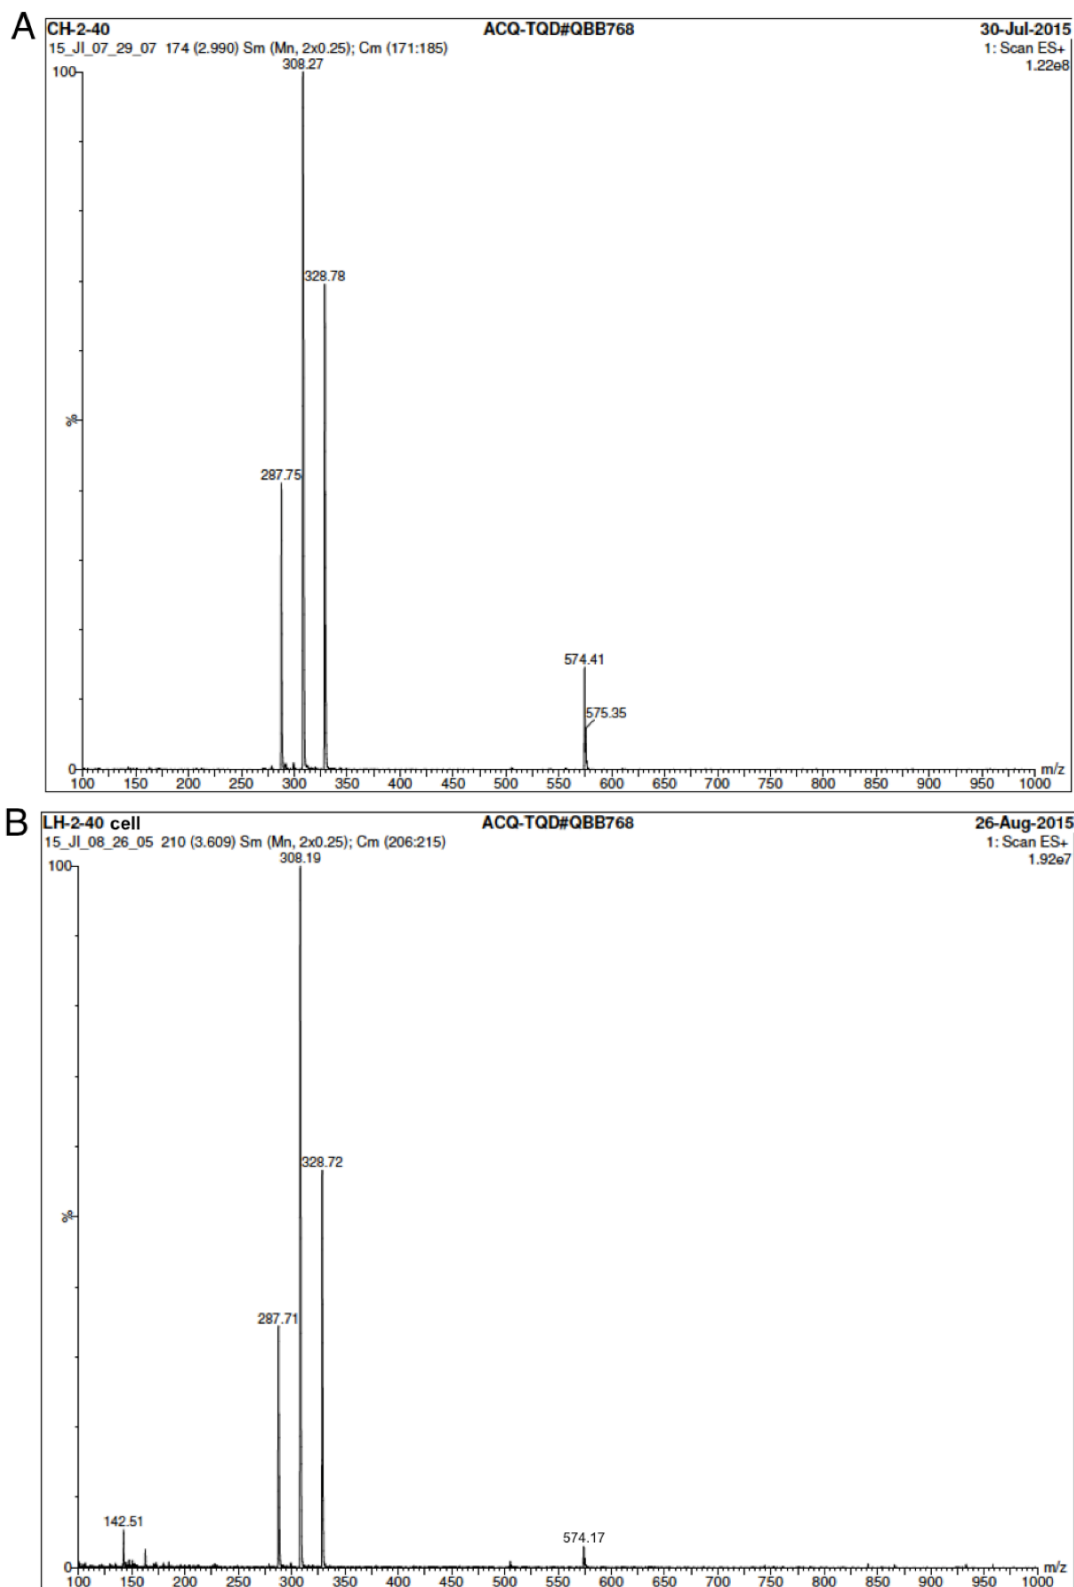

**Figure S5.** Mass spectrometry (MS) data for the HPLC peaks in Figure 3C. (A) pure **3**. (B) MDA-MB-231 cell samples after the treatment with **3** for 24 h.

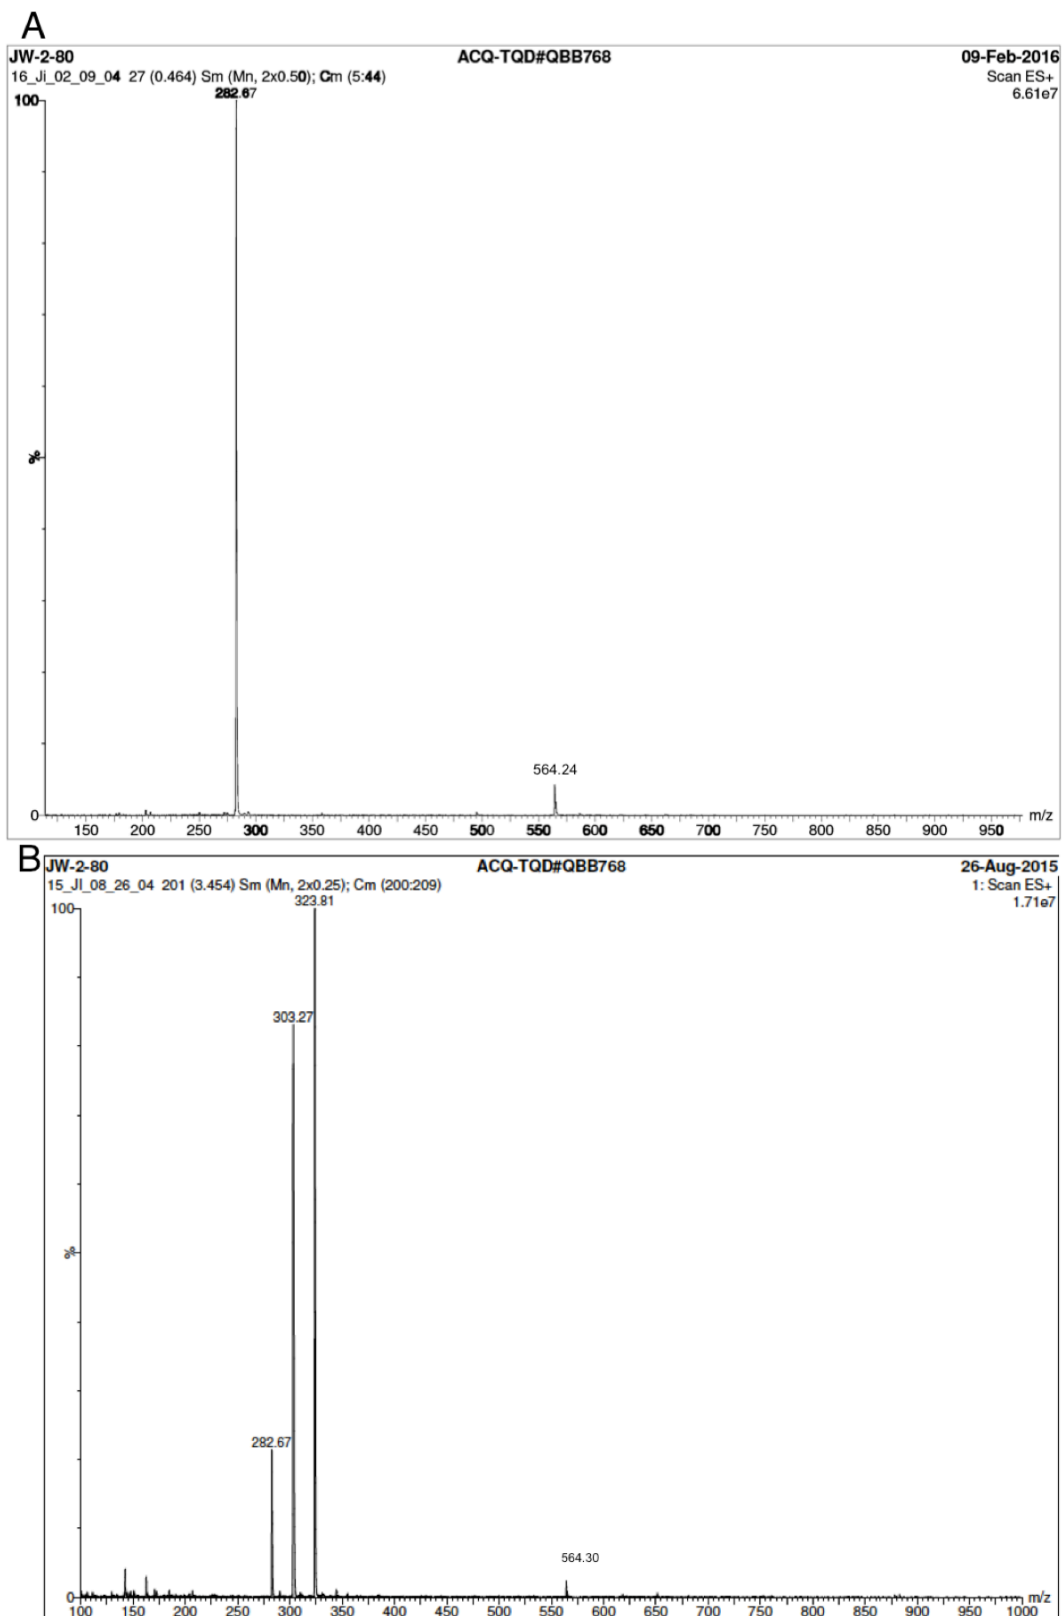

**Figure S6.** Mass spectrometry (MS) data for the HPLC peaks in Figure 3D. (A) pure **4**. (B) MDA-MB-231 cell samples after the treatment with **4** for 24 h.

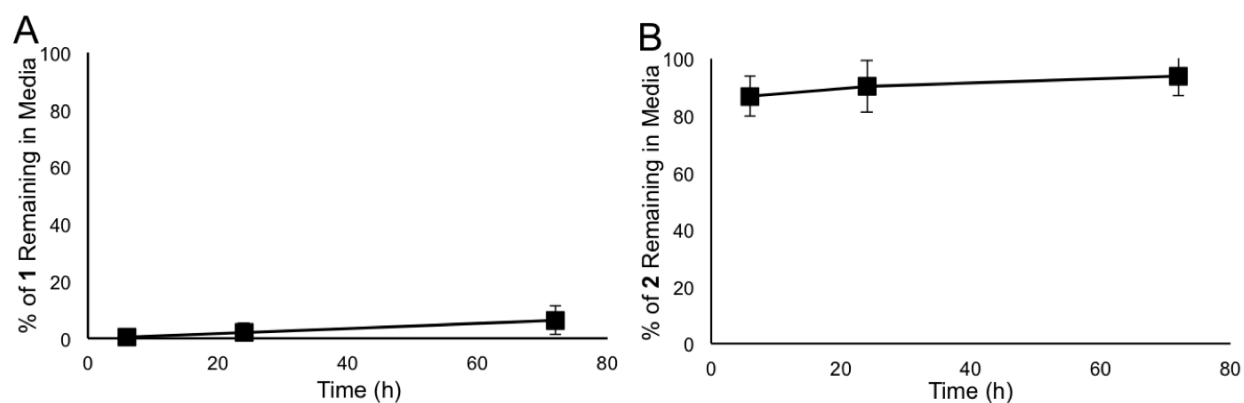

**Figure S7.** Time-dependence of the percent of the  $\beta$ -catenin/BCL9 inhibitors remaining the DMEM medium. Inhibitors **3** (A) and **4** (B) were incubated over a period of 72 h with the initial concentration of 2 and 20  $\mu$ M. Each set of data is expressed as mean  $\pm$  standard deviation (SD) (n = 3).

**A**

| HPLC Injection<br>(10 $\mu$ L) | Concentration of <b>5</b><br>(mol/L) | AUC (mAU)          |
|--------------------------------|--------------------------------------|--------------------|
| 1                              | $1.92 \times 10^{-3}$                | $3.78 \times 10^4$ |
| 2                              |                                      | $3.50 \times 10^4$ |
| 3                              |                                      | $3.72 \times 10^4$ |
| 1                              | $9.59 \times 10^{-4}$                | $2.01 \times 10^4$ |
| 2                              |                                      | $1.92 \times 10^4$ |
| 3                              |                                      | $1.90 \times 10^4$ |
| 1                              | $4.79 \times 10^{-4}$                | $9.82 \times 10^3$ |
| 2                              |                                      | $9.52 \times 10^3$ |
| 3                              |                                      | $9.69 \times 10^3$ |
| 1                              | $2.40 \times 10^{-4}$                | $4.97 \times 10^3$ |
| 2                              |                                      | $5.03 \times 10^3$ |
| 3                              |                                      | $5.02 \times 10^3$ |
| 1                              | $1.20 \times 10^{-4}$                | $2.32 \times 10^3$ |
| 2                              |                                      | $2.33 \times 10^3$ |
| 3                              |                                      | $2.32 \times 10^3$ |
| 1                              | $5.99 \times 10^{-5}$                | $1.23 \times 10^3$ |
| 2                              |                                      | $1.24 \times 10^3$ |
| 3                              |                                      | $1.14 \times 10^3$ |

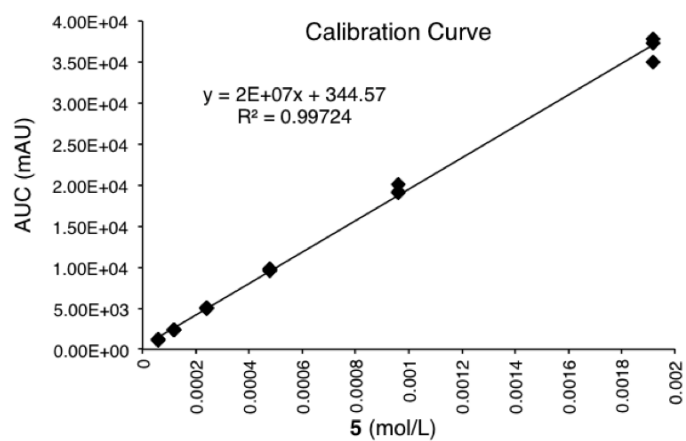

**B**

| HPLC Injection<br>(10 $\mu$ L) | Concentration of <b>6</b><br>(mol/L) | AUC (mAU)          |
|--------------------------------|--------------------------------------|--------------------|
| 1                              | $2.29 \times 10^{-3}$                | $3.52 \times 10^4$ |
| 2                              |                                      | $3.56 \times 10^4$ |
| 1                              | $1.15 \times 10^{-3}$                | $1.94 \times 10^4$ |
| 2                              |                                      | $1.79 \times 10^4$ |
| 3                              |                                      | $1.92 \times 10^4$ |
| 1                              | $5.74 \times 10^{-4}$                | $9.74 \times 10^3$ |
| 2                              |                                      | $9.22 \times 10^3$ |
| 3                              |                                      | $9.26 \times 10^3$ |
| 1                              | $2.87 \times 10^{-4}$                | $4.73 \times 10^3$ |
| 2                              |                                      | $4.71 \times 10^3$ |
| 3                              |                                      | $4.77 \times 10^3$ |
| 1                              | $1.43 \times 10^{-4}$                | $2.28 \times 10^3$ |
| 2                              |                                      | $2.34 \times 10^3$ |
| 3                              |                                      | $2.37 \times 10^3$ |
| 1                              | $7.17 \times 10^{-5}$                | $1.13 \times 10^3$ |
| 2                              |                                      | $1.13 \times 10^3$ |
| 3                              |                                      | $1.09 \times 10^3$ |
| 1                              | $3.59 \times 10^{-5}$                | $5.47 \times 10^2$ |
| 2                              |                                      | $5.60 \times 10^2$ |
| 3                              |                                      | $5.43 \times 10^2$ |

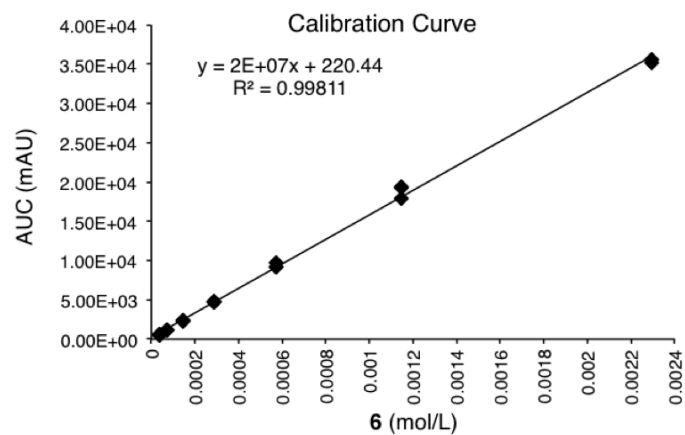

| C | HPLC Injection<br>(10 $\mu$ L) | Concentration of 7<br>(mol/L) | AUC (mAU)          |
|---|--------------------------------|-------------------------------|--------------------|
|   | 1                              | $3.04 \times 10^{-3}$         | $2.77 \times 10^4$ |
|   | 2                              |                               | $2.82 \times 10^4$ |
|   | 1                              | $1.52 \times 10^{-3}$         | $1.51 \times 10^4$ |
|   | 2                              |                               | $1.43 \times 10^4$ |
|   | 3                              |                               | $1.52 \times 10^4$ |
|   | 1                              | $7.61 \times 10^{-4}$         | $7.71 \times 10^3$ |
|   | 2                              |                               | $7.46 \times 10^3$ |
|   | 3                              |                               | $7.59 \times 10^3$ |
|   | 1                              | $3.80 \times 10^{-4}$         | $3.71 \times 10^3$ |
|   | 2                              |                               | $3.73 \times 10^3$ |
|   | 3                              |                               | $3.78 \times 10^3$ |
|   | 1                              | $1.90 \times 10^{-4}$         | $1.76 \times 10^3$ |
|   | 2                              |                               | $1.80 \times 10^3$ |
|   | 3                              |                               | $1.84 \times 10^3$ |
|   | 1                              | $9.51 \times 10^{-5}$         | $8.82 \times 10^2$ |
|   | 2                              |                               | $8.77 \times 10^2$ |
|   | 3                              |                               | $8.91 \times 10^2$ |

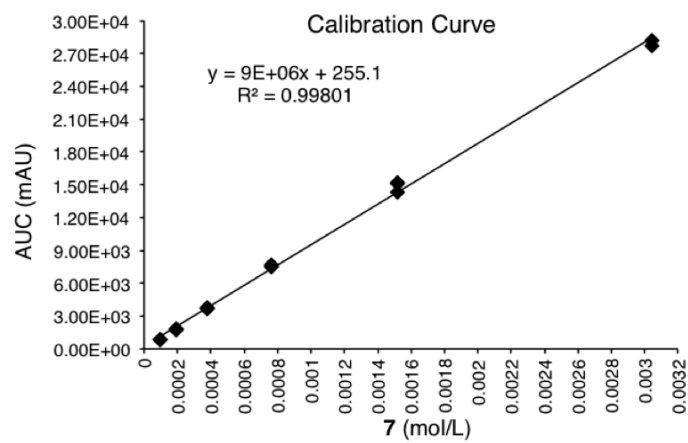



| D | HPLC Injection<br>(10 $\mu$ L) | Concentration of <b>8</b><br>(mol/L) | AUC (mAU)          |
|---|--------------------------------|--------------------------------------|--------------------|
|   | 1                              | $3.14 \times 10^{-3}$                | $2.22 \times 10^4$ |
|   | 2                              |                                      | $2.17 \times 10^4$ |
|   | 3                              |                                      | $2.28 \times 10^4$ |
|   | 1                              | $1.57 \times 10^{-3}$                | $1.17 \times 10^4$ |
|   | 2                              |                                      | $1.12 \times 10^4$ |
|   | 3                              |                                      | $1.05 \times 10^4$ |
|   | 1                              | $7.85 \times 10^{-4}$                | $5.61 \times 10^3$ |
|   | 2                              |                                      | $5.54 \times 10^3$ |
|   | 3                              |                                      | $5.92 \times 10^3$ |
|   | 1                              | $3.93 \times 10^{-4}$                | $2.89 \times 10^3$ |
|   | 2                              |                                      | $2.87 \times 10^3$ |
|   | 3                              |                                      | $2.97 \times 10^3$ |
|   | 1                              | $1.96 \times 10^{-4}$                | $1.42 \times 10^3$ |
|   | 2                              |                                      | $1.37 \times 10^3$ |
|   | 3                              |                                      | $1.46 \times 10^3$ |
|   | 1                              | $9.82 \times 10^{-5}$                | $7.30 \times 10^3$ |
|   | 2                              |                                      | $9.49 \times 10^3$ |
|   | 3                              |                                      | $7.14 \times 10^3$ |

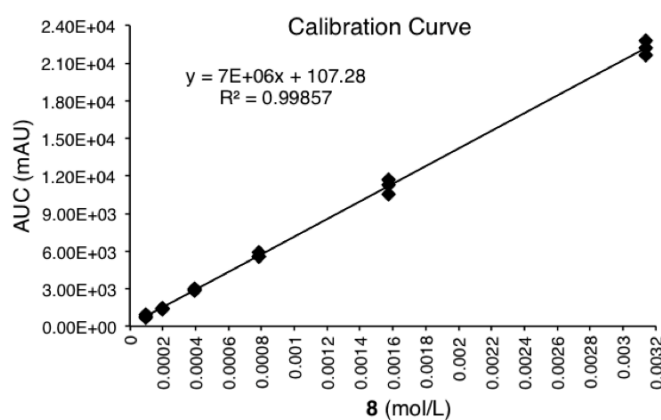

**Figure S8.** Determination of the calibration curves for **5–8**. (A) Areas under curve (AUCs) of the UV absorption and the different concentrations of pure **5** for HPLC analyses. The calibration curve and the calibration equation of **5**. (B) Areas under curve (AUCs) of the UV absorption and the different concentrations of pure **6** for HPLC analyses. The calibration curve and the calibration equation of **6**. (C) Areas under curve (AUCs) of the UV absorption and the different concentrations of pure **7** for HPLC analyses. The calibration curve and the calibration equation of **7**. (D) Areas under curve (AUCs) of the UV absorption and the different concentrations of pure **8** for HPLC analyses. The calibration curve and the calibration equation of **8**.

**Table S1.** Calculated physicochemical properties of **1–8**.

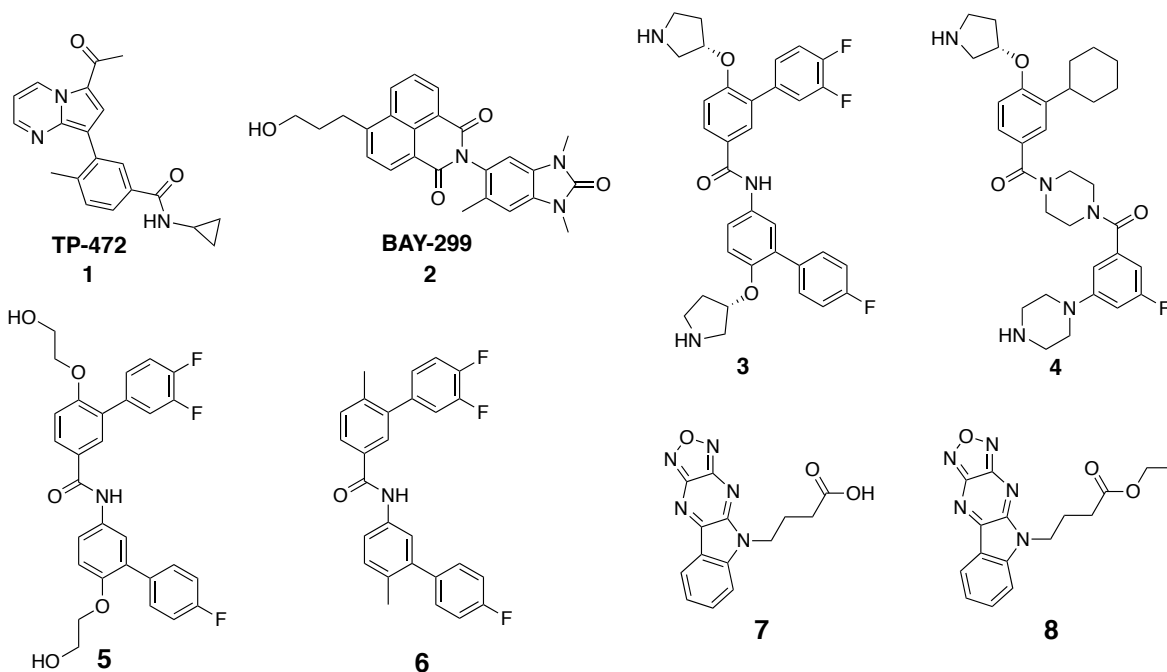

| Compound | Physical Properties |                  |                  |                   |                |        |       |                                       |
|----------|---------------------|------------------|------------------|-------------------|----------------|--------|-------|---------------------------------------|
|          | MW <sup>a</sup>     | HBD <sup>b</sup> | HBA <sup>c</sup> | tPSA <sup>d</sup> | rotatable bond | charge | cLogP | logD <sub>pH = 7.0</sub> <sup>e</sup> |
| <b>1</b> | 333                 | 1                | 3                | 61.8              | 6              | 0      | 2.48  | not calculated                        |
| <b>2</b> | 429                 | 1                | 4                | 81.2              | 8              | 0      | 2.55  | not calculated                        |
| <b>3</b> | 573                 | 3                | 5                | 71.6              | 8              | +2     | 5.08  | 1.21                                  |
| <b>4</b> | 563                 | 2                | 5                | 77.2              | 6              | +2     | 3.96  | 0.63                                  |
| <b>5</b> | 523                 | 3                | 5                | 88.0              | 12             | 0      | 4.14  | 1.70                                  |
| <b>6</b> | 431                 | 1                | 1                | 29.1              | 4              | 0      | 7.25  | 7.17                                  |
| <b>7</b> | 297                 | 1                | 7                | 99.2              | 4              | −1     | 2.98  | 0.34                                  |
| <b>8</b> | 325                 | 0                | 7                | 88.2              | 6              | 0      | 3.94  | 3.96                                  |

<sup>a</sup> molecular weight.

<sup>b</sup> number of hydrogen bond acceptors.

<sup>c</sup> number of hydrogen bond donors.

<sup>d</sup> topological polar surface area (Å<sup>2</sup>).

<sup>e</sup> logD was calculated by ACD/logD.<sup>41</sup>

**Supplementary Reference:**

(41) Liao, C.; Nicklaus, M. C. Comparison of nine programs predicting  $pK_a$  values of pharmaceutical substances. *J. Chem. Inf. Model.* **2009**, *49*, 2801–2812.
